# Supplementary material
Source: Springer Nature journal article supplement (https://www.springerprofessional.de/resource/supplementary/13673_2012_43_MOESM4_ESM.pdf/11899380)
Supplement: MOESM4 [file 11899380]

# Client Browser

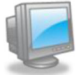

Client

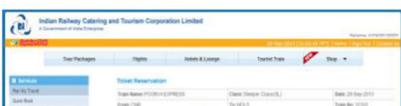

Speech Enabler  
View

**Tour Reservation**

| Reservation ID | Train Name | Date       |
|----------------|------------|------------|
| 1234567890     | Train Name | 2013-01-01 |

**Passenger Details**

| Sl. No. | Name | Age | Sex | Class | Coach |
|---------|------|-----|-----|-------|-------|
| 1       |      |     |     | 1A    | 1     |
| 2       |      |     |     | 1A    | 1     |
| 3       |      |     |     | 1A    | 1     |
| 4       |      |     |     | 1A    | 1     |
| 5       |      |     |     | 1A    | 1     |
| 6       |      |     |     | 1A    | 1     |
| 7       |      |     |     | 1A    | 1     |
| 8       |      |     |     | 1A    | 1     |
| 9       |      |     |     | 1A    | 1     |
| 10      |      |     |     | 1A    | 1     |

**Passenger Details**

| Sl. No. | Name | Age | Sex | Class | Coach |
|---------|------|-----|-----|-------|-------|
| 1       |      |     |     | 1A    | 1     |
| 2       |      |     |     | 1A    | 1     |
| 3       |      |     |     | 1A    | 1     |
| 4       |      |     |     | 1A    | 1     |
| 5       |      |     |     | 1A    | 1     |
| 6       |      |     |     | 1A    | 1     |
| 7       |      |     |     | 1A    | 1     |
| 8       |      |     |     | 1A    | 1     |
| 9       |      |     |     | 1A    | 1     |
| 10      |      |     |     | 1A    | 1     |

Activities

1A FC 2A 3A 3E CC SL 2S  
12417  
Link: PRAYAG RAJ EXP 00:15 06:55  
Radio button: Not selected X  
Radio button: Selected X X  
Radio button: Not selected X  
12303  
Link: POORVA EXPRESS 00:32 07:20  
Radio button: Not selected X  
Radio button: Not selected X  
Radio button: Not selected X X  
Radio button: Not selected X  
12225  
Link: KAIFIYAT EXP 00:50 07:00  
Radio button: Not selected X  
Radio button: Not selected X  
Radio button: Not selected X X

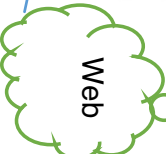

Web

Normal View

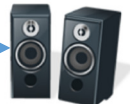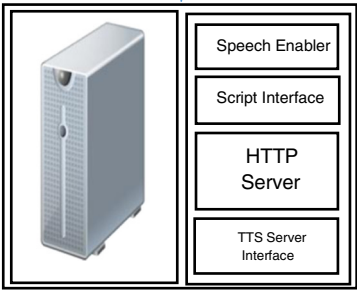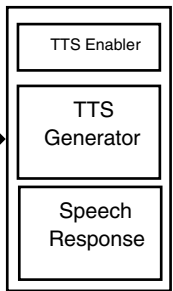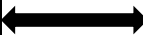

Website Server

TTS
